1

2 ***Measuring biodiversity from DNA in the air***

3

4 Elizabeth L. Clare\*,<sup>1,2</sup> Chloe K. Economou<sup>1</sup>, Frances J. Bennett<sup>1</sup>, Caitlin E. Dyer<sup>1</sup>, Katherine  
5 Adams<sup>3</sup>, Benjamin McRobie<sup>3</sup>, Rosie Drinkwater<sup>1</sup>, Joanne E. Littlefair<sup>1</sup>

6

7 1. School of Biological and Chemical Sciences, Queen Mary University of London, London. UK,  
8 E14NS

9 2. Department of Biology, York University, Toronto, Ontario, Canada, M3J1P3

10 3. Hamerton Zoo Park, Huntingdon, UK, PE28 5RE

11

12 **Corresponding author:** Elizabeth L Clare

13 Department of Biology, York University, Toronto, Ontario, Canada, M3J1P3

14 519-503-3898

15 **Email:** [eclare@yorku.ca](mailto:eclare@yorku.ca)

16

17 Deposited as a preprint at bioRxiv

18

19 **Author Contributions:** ELC designed the experiment and performed field work, CKE performed  
20 all laboratory work, FJB performed field work, CED, RD and JEL performed analysis, KA and BM  
21 facilitated field work. All authors contributed to manuscript preparation.

22

23 **Competing Interest Statement:** Authors declare no competing interests.

24

25 **Classification:** Biological Sciences: Ecology

26

27 **Keywords:** airDNA, environmental DNA, eDNA, biosurvey

28

29 **This PDF file includes:**

30

Main Text

31

Figures 1 to 2

32

Tables 1 to 3

## 33 **Abstract**

34 Impacts of the biodiversity crisis far exceed our ability to monitor changes in terrestrial ecosystems.  
35 Environmental DNA has revolutionized aquatic biomonitoring, permitting remote population and  
36 diversity assessments. Here we demonstrate that DNA from terrestrial animals can now be  
37 collected from the air under natural conditions, a ground-breaking advance for terrestrial  
38 biomonitoring. Using air samples from a zoological park, where species are spatially confined and  
39 unique compared to native fauna, we show that DNA in air can be used to identify the captive  
40 species and their potential interactions with local taxa. Air samples contained DNA from 25 species  
41 of mammal and bird including 17 known (and distinct) terrestrial zoo species. We also identified  
42 food items from air sampled in enclosures and detected four taxa native to the local area, including  
43 the Eurasian hedgehog, endangered in the UK, and the muntjac deer, a locally established invasive  
44 species. Our data provide evidence that airDNA is concentrated around recently inhabited areas  
45 (e.g., indoor enclosures) but that there is dispersal away from the source suggesting an ecology to  
46 airDNA movement which highlights the potential for airDNA sampling at distance. Our data clearly  
47 demonstrate the profound potential of air as a source of DNA for global terrestrial biomonitoring  
48 and ecological analysis.

49

50 **Significance Statement:** The global decline in biodiversity requires rapid non-invasive  
51 biomonitoring tools applicable at a global scale. In this study we collect environmental DNA from  
52 mammals and birds from air samples collected in a natural setting. Using only air, we identified 25  
53 species of mammal and bird known to be in the area. Our dataset detected species at risk of local  
54 extinction and several confirmed predator-prey interactions. This approach will revolutionize  
55 terrestrial biodiversity surveys.

56

## 57 **Main Text**

58

## 59 **Introduction**

60

61 Anthropogenic impacts have caused pervasive biodiversity declines across ecosystems (Díaz et  
62 al., 2019; C. N. Johnson et al., 2017; Seibold et al., 2019), particularly from land-use change, habitat  
63 loss and degradation (Tilman et al., 2017) leading to the reorganization of global biodiversity  
64 patterns and processes (Barlow et al., 2018; Eriksson & Hillebrand, 2019). Rapid and accurate  
65 biomonitoring techniques are essential to our attempts to quantify the causes and consequences  
66 of global environmental change (Amano et al., 2018; Eriksson & Hillebrand, 2019) and to assist  
67 with focused, on-the-ground conservation efforts. Our inability to detect species and measure  
68 population dynamics rapidly and accurately is often cited as a fundamental challenge in quantifying  
69 our position relative to biodiversity and conservation targets (Amano et al., 2018; C. N. Johnson et  
70 al., 2017). Indeed, detecting changes in diversity, abundance, and community composition as well  
71 as species range shifts are priorities highlighted by researchers, conservationists, and major  
72 international initiatives (Amano et al., 2018). New approaches that provide simpler, large-scale, and  
73 automated monitoring techniques are an urgent requirement, needed to address the often-  
74 intractable challenge of biodiversity monitoring (Barlow et al., 2018). Decades of development in  
75 molecular diagnostics have resulted in established DNA-based approaches for determining species  
76 (Blaxter, 2003; Hebert, Cywinska, Ball, & DeWaard, 2003; Tautz et al., 2002) and detecting  
77 ecological interactions (Pompanon et al., 2012). The development of DNA reference databases,  
78 which permit rapid species identification from unknown environmental samples of (even  
79 fragmentary) genetic material, has the potential to transform our ability to monitor global  
80 ecosystems. Yet biodiversity monitoring often still relies on capture of live specimens, which is both  
81 rate limiting and invasive (Singer, Fahner, Barnes, McCarthy, & Hajibabaei, 2019).

82

83 It is well documented that DNA is shed from all organisms and deposited as environmental (e)DNA.  
84 This material has been used to analyze contemporary and past ecosystems for nearly two decades  
85 (Willerslev et al., 2007, 2014, 2003). An explosion of interest in using aquatic eDNA to assay  
86 populations and track invasive species has revolutionized aquatic science, management, and

87 conservation (Ruppert, Kline, & Rahman, 2019). As the field matures, considerable research effort  
88 now focuses on the “ecology of eDNA” (Barnes & Turner, 2016) – quantifying and understanding  
89 factors influencing eDNA detections beyond inventories alone. Comparative studies have shown  
90 that metabarcoding of aquatic eDNA matches or even outperforms conventional methods of  
91 community sampling (Bessey et al., 2021; Mena et al., 2021; Ruppert et al., 2019). Additionally, an  
92 indication of terrestrial biodiversity can also be obtained from eDNA analysis of water and  
93 sediments sampled from aquatic systems (Sales et al., 2020; Ushio et al., 2017), though detections  
94 may be biased towards semi-aquatic species. A comparison of tropical mammal detection methods  
95 (Mena et al., 2021) including eDNA from lentic and lotic systems, live-trapping, pitfall traps, camera  
96 traps, and mistnets found integrated methods provide best estimates of community composition.  
97 Although aquatic eDNA alone recovered much of the diversity of mammals (Mena et al., 2021) this  
98 would be limited when aquatic systems are not in the vicinity.

99  
100 A truly terrestrial targeted eDNA system has not yet been developed. On land, eDNA has been  
101 measured in permafrost, blood, snow, soil, and honey (Bohmann et al., 2014) and recently by  
102 spraying foliage and collecting the runoff to gather eDNA from the surfaces (Valentin et al., 2020).  
103 Collecting eDNA from the air, analogous to aquatic eDNA sampling, has remained mostly  
104 theoretical (Ruppert et al., 2019) with a few demonstrations recovering DNA from plants (Folloni et  
105 al., 2012; M. D. Johnson, Cox, & Barnes, 2019) or fungi (Banchi et al., 2020), although these were  
106 based primarily on the analysis of collected dust. We recently demonstrated (Clare et al., 2021)  
107 that animal DNA can be extracted directly from air under highly controlled laboratory conditions.  
108 The potential for sampling life from air samples could revolutionize terrestrial biodiversity  
109 assessments, but to date it has not been tested in the wild. The challenge with validating airDNA  
110 methods is establishing an experimental design that permits spatial scales for detection without  
111 confounding DNA sources. Zoological parks are ideal for this because they contain captive colonies  
112 of mostly non-native species whose identity and spatial location are known with certainty. Indeed,  
113 metabarcoding of soils from safari parks, zoological gardens and farms has been used to test the  
114 efficacy of these approaches and results have reflected the overall taxonomic richness of terrestrial  
115 vertebrates present (Anderson-Carpenter et al., 2011).

116  
117 Our objective is to use air samples from a zoological park in Huntingdonshire UK to identify zoo  
118 species and native wildlife in the first practical application of airDNA sampling under natural  
119 conditions. This approach will greatly extend the validation of this technique for global terrestrial  
120 biomonitoring and establishes the potential uses of airDNA in ecological systems.

121

## 122 **Materials and Methods**

123

### 124 **Methods**

125

#### 125 **Sample Collection**

126

127

128

129

130

131

132

133

134

135

136

137

138

139

This study was conducted at Hamerton Zoo Park, a 25-acre conservation zoo in Huntingdonshire  
UK established in 1990 and containing approximately 100 species of animal, mostly mammals and  
birds of conservation concern. It is surrounded by a matrix of agricultural land in rural England.  
Most species live in enclosures which have free access to outside ranges allowing free air  
exchange. Air samples were collected using a peristaltic pump (Geotech) and Sterivex-HV filtered  
(Merck Millipore) with 0.22 µm and 0.45 µm filter sizes. We targeted 15 enclosures which contained  
zoo species represented in molecular reference collections. For each of these locations, we  
sampled air for 30 min at 300ml/min filter rate using each filter and we sampled inside an enclosure  
(e.g. the sleeping chamber) and outside in the open air enclosure (where species move about  
freely) within 5m of the enclosure opening. We also sampled from general areas of the zoo including  
the Cat Circle, Owl walkway and near rubbish bins. In addition, we sampled at the Tasmanian  
Golden Possum Enclosure and Syrian Brown Bear Enclosure, but Golden Possums were not  
represented in reference databases and the bears were in their hibernation cycle and closed to  
close sampling (i.e. no indoor samples were taken). We treat these two areas as general areas for

140 sampling. All filters were placed in sterile bags following sample collection and frozen for DNA  
141 extraction.

142

### 143 **DNA extraction**

144 DNA extraction and PCR were carried out within a biological safety cabinet under maximum flow.  
145 All extraction procedures followed (Clare et al., 2021). In general, all equipment was sterilized using  
146 UV, 10% bleach, 70% ethanol and ultrapure water between each sample. Following existing  
147 protocols (Cruaud et al., 2017), the filter was cracked open and the filter removed. DNA was  
148 extracted using a Blood and Tissue kit (Qiagen UK) following manufacturer's protocol but with ATL  
149 buffer volumes increased to 450µl to ensure the filters were submerged. We used 50µl proteinase  
150 K, 500µl buffer AL and 500µl of 100% ethanol. We used multiple negative controls at the extraction,  
151 PCR and sequencing stages. Samples were lysed overnight using a platform shaking at 650rpm at  
152 56°C. The samples were then vortexed and transferred to fresh tubes for extraction. We used QIA  
153 shredder spin columns (Qiagen UK) on the remaining filter paper and the flow-through was added  
154 to the rest of the sample at which point buffer AL was added. Extraction then followed manufacturer  
155 instructions but with centrifugation completed at 11,000 rpm for 3 min following AW2. DNA was  
156 eluted in 30 µl of elution buffer pre heated to 70 °C. Elution buffer was cycled through the column  
157 three times with 5 min incubation times in each cycle to increase DNA concentration.

158

### 159 **PCR amplification and sequencing**

160

161 Each DNA extract was subjected to three PCRs as follows:

162

163 *16S PCR* - We amplified a small region of 16S mammal mitochondria using the mam1 and mam2  
164 primers (Taylor, 1996) modified with adaptors for the Illumina MiSeq sequencing platform. The PCR  
165 mix included 7.5µl of Qiagen multiplex mix, 1.5µl ddH<sub>2</sub>O, 5µl of template DNA and 0.5µl of each  
166 primer (10µM stocks of each) and amplification used cycling conditions of 95°C for 15min, 40 cycles  
167 of 94°C for 30s, 55°C for 90s, 72°C for 90s, and a final 72°C for 10min and a 10°C hold.

168

169 *16S nested PCR* - To increase amplification success for low yield sample we performed nested  
170 PCRs. For the nested 16S PCRs we first used non-tagged mam1 and mam2 primers. For these  
171 reactions, we used 3µl of template DNA (adjusting the amount of water accordingly) and increased  
172 the annealing temperature to 59°C. We then used 1µl of each PCR product from the first reaction  
173 as a template for a second PCR, again using the same 16S mam1 and mam2 Illumina MiSeq  
174 tagged primers. PCR conditions for the second PCR were as previously mentioned.

175

176 *COI nested PCR* - We amplified a small portion of the 5' end of the cytochrome oxidase gene using  
177 AquaF2 forward and VR1d reverse primers (Ivanova, Clare, & Borisenko, 2012). We employed a  
178 two-step nested PCR strategy. For the first stage PCR, the PCR mix we used comprised 7.5µl  
179 Qiagen multiplex mix, 3.5µl ddH<sub>2</sub>O, 3µl of template DNA and 0.5 µl of each primer (10 µM stocks  
180 of each). For the majority of samples, we used 1µl of PCR product from this first reaction as a  
181 template for a second PCR using AquaF2 and VR1d Illumina MiSeq tagged primers. For selected  
182 samples with significant non-target bands, we gel extracted the target band from the first PCR  
183 (Monarch DNA Gel Extraction Kit) and used 1 µl of this purified DNA in the second PCR. Reaction  
184 conditions for both first and second PCRs were as follows: 95°C for 15min, followed by 40 cycles  
185 of 94°C for 30s, 51°C for 90s, and 72°C for 90s and a final extension at 72°C for 10min, then a hold  
186 at 10°C.

187

### 188 **PCR visualization and sequencing**

189 All products, including positive (cow DNA) and negative controls were visualized using a 1%  
190 agarose gel as an initial screening tool and then quantified using Qubit and TapeStation. Amplicons  
191 were sequenced on an Illumina MiSeq using unique 5' forward tags at the Barts and the London  
192 Genome Centre following standard protocol using bidirectional 250bp chemistry. The results were  
193 demultiplexed by tag for bioinformatics processing.

194

195 **Bioinformatics methods for COI regions**

196 COI read files were uploaded to the mBRAVE platform (<http://www.mbrave.net>). Paired end  
197 samples were assembled with a minimum overlap of 20bp and max substitution of 5bp. Samples  
198 were processed to maximize data retention for later steps with the following parameters, Trim  
199 Front=38bp, Trim End=26bp, Trim Length=500bp, Min QV filter=0, Min Length=100bp, Max bases  
200 with low (<20) QV=75%, Max bases with ultra low QV (<10)=75%. ID threshold=10%, Exclude from  
201 OTU at 10% MIN OTU size=1 and OTU threshold=2%.

202

203 The reads were compared to the “Hamerton Zoo 1” bespoke reference database consisting of 610  
204 sequences representing 20 species known to reside at the zoo and targeted in our sampling. These  
205 data were taken from existing public data in the BOLD database. Sequences not identified by  
206 comparison to this bespoke reference collection were then screened in sequential order to system  
207 reference libraries:

208 SYS-CRLCHORDATA (Chordata references) consisting of 40,565 species

209 SYS-CRLAVES (Aves reference) consisting of 5832 species

210 SYS-CRLBACTERIA (Bacteria reference) consisting of 2066 species

211 SYS-CRLFUNGI (Fungi reference) consisting of 565 species

212 SYS-CRLINSECTA (Insect reference) consisting of 217,994 species

213 SYS-CRNONINSECTARTH (Non-Insect Arthropoda reference) consisting of 27,832 species

214 SYS-NONARTHINVERT (Non-Arthropoda Invertebrate reference) consisting of 34,927 species

215 SYS-CRLPROTISTA (Protista COI reference collection) consisting of 5250 species

216

217 **Bioinformatics methods for 16S regions**

218 We used AdapterRemoval V2 (Schubert, Lindgreen, & Orlando, 2016) to first identify and then  
219 remove adapter contamination, using the additional parameters --trimns and --trimqualities, to  
220 remove Ns and runs of low quality bases. Read pairs were not collapsed at this step. We processed  
221 the remaining reads into amplicon sequence variants (ASVs) using the DADA2 pipeline (Callahan  
222 et al., 2016) in R (“R Development Core Team: R: A language and environment for statistical  
223 computing,” 2021; RStudio Team, 2020). We filtered the reads using DADA2 with the following  
224 parameters: truncate length after 100 bases in both directions (truncLen=c(100,100)), reads with  
225 any Ns were removed (maxN=0), reads higher than expected error removed (maxEE=c(2,2)),  
226 truncate reads based on low quality scores (truncQ=2) and discard phiX genes (rm.phix=TRUE).  
227 Each of the filtered read pairs were dereplicated, the amplicon error rate was estimated, and the  
228 core algorithm was used to calculate the true ASVs counts in the data. Finally, read pairs were  
229 merged, ASVs in each sample were counted and chimeric sequences were removed.

230

231 Final 16S ASVs were blasted against a local subset of the GenBank database (search term: “16S”,  
232 downloaded 23rd May 2021, 467,306 records), with >97% identity and output hits limited to 15  
233 sequences. We manually discarded hits with low query coverage (<90%). We then applied BASTA  
234 (a last common ancestor algorithm) to the resulting hits, configured to return a majority taxonomy  
235 from 90% of the hits (Kahlke & Ralph, 2019). Because the Tyra (*Eira barbara*) was not represented  
236 within the 16S reference data we reran this comparison allowing 96% matches to the nearest  
237 ancestor in the reference data *Gulo gulo* (not present in the zoo) and assigned ASVs to *Eira barbara*  
238 if there was a 96% match to *Gulo gulo*.

239

240 **Data filtering**

241 For both COI and 16S data we excluded *Heterocephalus glaber* or *Fukomys damerensis*  
242 identifications as expected contamination from the previous experiment using the same equipment  
243 (Clare et al., 2021) and we excluded all human sequences which are expected as a general  
244 contamination in all samples and controls. We then examined negative well contamination and  
245 recorded identifications in negative samples and the number of reads. We differentiated  
246 identifications which would remain if largest negative well ID number was used as a filter and treat  
247 each of the three amplifications separately (e.g. a negative well with a 500 reads assigned as a

248 contamination would cause us to flag any ID with 500 or fewer reads assigned, we treat this  
249 maximum read count filter separately for COI, 16S and 16S nested PCRs, Supplemental  
250 Information).

251

### 252 **Statistical analysis**

253 Read counts from all three PCR procedures were pooled (Supplemental Information 2) and mean  
254 read counts/location for each identified zoo species were calculated. We first examined the effect  
255 of the sampling position relative to the animal's own enclosure (i.e. inside (n=23) or outside (n=79)  
256 the animal's own enclosure) on read counts. In a second model, we examined the relationship  
257 between read counts and distance from the animal's enclosure. The distances between the  
258 sampling points to the originating enclosures were calculated as a straight line to the nearest meter  
259 using google maps satellite view (i.e. the distance between a sampling point which detected tiger  
260 DNA and the tiger enclosure). Distance varied from 0 – 276 metres, but we excluded zero distance  
261 datapoints (i.e. datapoints from inside the animal's own enclosure, n = 23), as this effect had already  
262 been examined by the first model. In both cases we used zero-inflated negative binomial mixed  
263 effects models using the glmmTMB package (Brooks et al., 2017) in R version 4.0.2 ("R  
264 Development Core Team: R: A language and environment for statistical computing," 2021), with  
265 species and filter ID as random effects (filter ID was necessary as we treated read counts from  
266 different species from the same filter as different data points). We checked for overdispersion and  
267 patterns in the model residuals using the DHARMA package (Hartig, 2021). In both models, we  
268 tested the significance of the "sample position" and "distance" terms in explaining the read counts  
269 by calculating the likelihood ratio test using the "drop1" function with a chi-squared distribution.

270

## 271 **Results**

272

### 273 **Sample collection**

274 We collected 72 air samples from 20 locations around Hamerton Zoo Park. Of these 64 yielded  
275 DNA which was identified as belonging to non-human terrestrial vertebrates with multiple sources  
276 represented in most samples (Figure 1). All data produced is available on the NCBI short read  
277 archive BioProject ID:PRJNA743788.

278

### 279 **16S Data**

280 We recovered 12,207,070 reads after the removal of adapter sequences; these were used as input  
281 into the DADA2 bioinformatic pipeline. After length and quality filtering, paired-end merging and  
282 removing chimeras, 11,707,400 reads remained assigned to 335 amplicon sequence variants  
283 (ASVs). Taxonomic ID of the ASVs was assigned using BLAST and further refined with BASTA  
284 using a last common ancestor (LCA) algorithm and based on 97% sequence similarity to the 16S  
285 reference database (see methods for *Eira barbara* identification parameters).

286

287 Several ASVs received higher level taxonomic assignments and were resolved as follows. ASVs  
288 designated as Artiodactyla were resolved to *Muntiacus reevesi* as the other similar match to a  
289 reference was *Cephalophus dorsali* (bay duiker) and is not possible on site. Similarly, ASVs  
290 designated a Cervidae were a perfect match to muntjac and a lower match to *Ozotoceros*  
291 *bezoarticus* which was not possible on site. We retain muntjac for these as well. ASVs identified as  
292 Herpestidae were perfect or highly similar (>99%) matches to *Suircata suiricata* (which was on site)  
293 and lower matches (97%) to other species not present thus we designate these as *S. suiricata*. An  
294 ASV identified as *Saguinus* was resolved to *Saguinus oedipus* based on matches >99% to that  
295 species which was present in the zoo while other potential matches were <98%.

296

### 297 **COI Data**

298 We recovered 6,167,294 reads from samples amplified by COI primers. These data were  
299 processed in the mBRAVE pipeline. Filtered data included 1,061,857 reads that were compared to  
300 reference databases. From these 361,889 reads were assigned to a non-human mBRAVE BINs  
301 (Ratnasingham & Hebert, 2013) at >97% sequence similarity and resolved to species level based

302 on sequence similarity matches >99% in most cases with the exception of *Canis* where species  
303 cannot be easily differentiated. We report these as dingo in Table 1, though it is also possible that  
304 domestic dog DNA is present on site.

### 305 306 **Negative controls for sequence filtering**

307 We used multiple negative controls at DNA extraction, PCR and as empty wells in the sequencing  
308 run. Negative well contamination following filtering was very low. However, there was contamination  
309 of black and white lemur (1,373 reads) in a negative sample from the 16S PCR negative, donkey  
310 (16,836 reads) in a negative of the nested 16S PCR and chicken (513 reads) in a negative of the  
311 COI nested PCR. Therefore, in the Supplemental Information for detections, we highlight any read  
312 count larger than these to indicate higher support for the taxonomic assignment. Some expected  
313 taxa based on sampling location produced read counts lower than these negative thresholds (e.g.  
314 *Panthera tigris*) thus we retain all data in Tables 1,2&3 and Supplemental Information to indicate  
315 these very likely positives but treat low copy number identifications with caution. All positive control  
316 data (cow) was recovered indicating high PCR efficiency and there was very minimal evidence of  
317 cow in negative extraction, PCR controls or empty wells used as sequencing controls suggesting  
318 that detections in samples represent real dietary detections.

### 319 320 **Statistical analysis**

321 We compared read counts with distance to most likely source using two models (Figure 2). There  
322 was a significant effect of the sample position relative to the animal's own enclosure on the read  
323 counts (Figure 2A, likelihood ratio statistic = 64.1, df = 1,  $p < 0.001$ ), with read counts inside the  
324 animal's own enclosure being higher (model estimate: 54,899 reads, confidence limits: 19225-  
325 156766) than read counts outside the animal's own enclosure (model estimate: 689 reads,  
326 confidence limits: 301-1578). When datapoints from within the animal's own enclosures were  
327 removed (i.e., zero distances), there was no relationship between read count numbers and distance  
328 from the enclosure (Figure 2B, likelihood ratio statistic = 3.01, df = 1,  $p = 0.0828$ ). Neither model  
329 was overdispersed.

### 330 331 **Discussion**

332  
333 Our objective was to collect DNA from air samples and use these to assay for local biodiversity  
334 under natural conditions. Using air samples collected at Hamerton Zoo Park we successfully  
335 recovered nearly 2.7 million non-human vertebrate DNA sequences. While our laboratory proof of  
336 concept (Clare et al., 2021) allowed us to predict that target species could be detected in confined  
337 spaces (i.e., inside a sleeping enclosure), detecting airDNA outside enclosures, away from a  
338 source, diluted by the air volume in open areas and subjected to wind and local weather  
339 represented a far greater challenge. The success of our study shows the potential of conducting  
340 biodiversity surveys in the wild, using airDNA, representing an exciting new frontier in biodiversity  
341 monitoring.

342  
343 In addition to the taxa we targeted as part of the known zoo stock, we identified three species of  
344 mammal and three species of bird known to be housed at the zoo but in enclosures that we did not  
345 have access to (Table 2, Table 3). These additional detections were frequently recovered at the  
346 closest sampling point to their actual residence. For example, the indoor exhibit housing budgies,  
347 *Melopsitacus undulatus*, and zebra finches, *Taenopygla guttata*, was closed during the sampling  
348 period but we detected their DNA in air samples collected at the adjacent primate house and  
349 possum enclosure. While DNA read counts were generally highest within the enclosure where they  
350 are expected, we picked up trace read counts in air samples taken more than 250 m from the most  
351 likely source (Figure 2). While contamination between samples is theoretically possible, samples  
352 were collected and processed on different days and high read counts were retained even after  
353 stringent filtering by sequence quality and negative controls. For example, meerkat DNA from an  
354 outdoor colony was identified in air sampled at the dingo enclosure 245 m away and at the gibbon

355 enclosure 122 m away. Copy number of recovered sequences was not related to distance from  
356 source when enclosures were excluded (Figure 2).

357

358 More than a third of the recovered sequences matched cow, horse, pig or chicken. While we cannot  
359 preclude DNA drifting in from the surrounding countryside, it is likely these represent food provided  
360 to the carnivores. Particularly high concentrations of chicken DNA were detected in the binturong  
361 and tayra enclosures while horse, cow and pig were concentrated in samples from the dingo  
362 enclosure, so correctly associated with dietary preference (Table 2). Detecting species interactions  
363 has been a special focus of environmental DNA approaches (Drinkwater et al., 2019; Pompanon  
364 et al., 2012) but this is the first time species interactions have been detected from air. We also  
365 observed some unexpected concentrations of these DNA sources perhaps reflecting the movement  
366 of people and materials throughout the zoo. For example, an unexpected concentration of pig and  
367 cow DNA inside the lemur enclosure could reflect the movement of people between animal houses.

368

369 While the primary aim of our study was an inventory of the zoo species, adjacent rural settings are  
370 a source for DNA from wildlife *in naturalibus*. We identified DNA associated with squirrels and ducks  
371 in several air samples. Several ducks are kept as zoo stock, but we could not identify the genus or  
372 species with accuracy, so we classify this as wildfowl but with caution. We may have detected  
373 *Myotis* bats, though we also treat this with caution as many bat DNA samples are handled in the  
374 processing laboratory facility (Table 2).

375

376 Of special interest was the detection of the European hedgehog in three samples. Hedgehogs are  
377 commonly observed on site by staff, though they are not as active in the winter thus their detection  
378 is particularly interesting. As of 2020, the hedgehog was listed as vulnerable to extinction in the UK  
379 (<https://www.mammal.org.uk/science-research/red-list/>), making it vital to develop additional  
380 methods to monitor and protect existing populations. UK species of special interest such as the  
381 great crested newt have been the model for the development of aquatic eDNA detection methods  
382 (Rees, Baker, Gardner, Maddison, & Gough, 2017) and provide a framework for validating airDNA  
383 for similar monitoring. Another commonly cited application of eDNA approaches is the detection of  
384 invasive species. We detected muntjac deer, *Muntiacus reevesi*, in five samples. These muntjacs  
385 are native to China but became locally invasive after multiple releases in England in the 19th  
386 century (Hemami, Watkinson, & Dolman, 2005). They are now well established in the east of  
387 England, the location of the zoological park. They are also provided in food for several species on  
388 site thus the detection of *M. reevesi* may reflect either food or wildlife (Table 3).

389

390 Our study provides compelling evidence that air can be used as a source of DNA for biomonitoring.  
391 The detection of multiple taxa in air samples known to reside at the zoo without high false positive  
392 detections strongly validates the local source of the DNA. The detection of species of conservation  
393 concern and invasive species, as well as DNA from dietary items, likely via the detection of  
394 aerosolized fecal material, is compelling and demonstrates the versatility of this genetic approach.  
395 High negative rates and low DNA extraction volumes and concentrations suggests a future role in  
396 pooling replicate samples, as is done in DNA biomonitoring using leeches (Schnell et al., 2018).  
397 This can increase positive hit rates while reducing sequencing costs. The rapid global uptake of  
398 aquatic eDNA as a biomonitoring tool highlights the need for new sampling techniques. If airDNA  
399 sampling is successfully developed it will have major implications for global terrestrial  
400 biomonitoring. The novel opportunities this method provides for tracking faunal composition, non-  
401 invasive monitoring of species of special ecological concern, and the detection of species invasion  
402 are extremely exciting, and suggest that airDNA could revolutionize the ways in which scientists  
403 study and monitor terrestrial biodiversity and could be implemented non-invasively at a global scale.

404

#### 405 **Acknowledgments**

406 This study was funded through an EPSRC impact accelerator account provided by Queen Mary  
407 University of London (Grant: EP/R511596/1). We appreciate the support of the Hamerton Zoo Park  
408 Staff and the Barts and the London Genome Centre for assistance during this project.



409

410

## References

411

Amano, T., Székely, T., Sandel, B., Nagy, S., Mundkur, T., Langendoen, T., ... Sutherland, W. J. (2018). Successful conservation of global waterbird populations depends on effective governance. *Nature*, 553(7687), 199–202. doi:10.1038/nature25139

412

413

Anderson-Carpenter, L. L., McLachlan, J. S., Jackson, S. T., Kuch, M., Lumibao, C. Y., & Poinar, H. N. (2011). Ancient DNA from lake sediments: bridging the gap between paleoecology and genetics. *BMC Evolutionary Biology*, 11, 30. doi:10.1186/1471-2148-11-30

414

415

Banchi, E., Ametrano, C. G., Tordoni, E., Stanković, D., Ongaro, S., Tretiach, M., ... Lazzarin, S. (2020). Environmental DNA assessment of airborne plant and fungal seasonal diversity. *Science of The Total Environment*, 738, 140249. doi:https://doi.org/10.1016/j.scitotenv.2020.140249

416

417

Barlow, J., França, F., Gardner, T. A., Hicks, C. C., Lennox, G. D., Berenguer, E., ... Graham, N. A. J. (2018). The future of hyperdiverse tropical ecosystems. *Nature*, 559(7715), 517–526. doi:10.1038/s41586-018-0301-1

418

419

Barnes, M. A., & Turner, C. R. (2016). The ecology of environmental DNA and implications for conservation genetics. *Conservation Genetics*, 17, 1–17. doi:10.1007/s10592-015-0775-4

420

421

Bessey, C., Neil Jarman, S., Simpson, T., Miller, H., Stewart, T., Kenneth Keesing, J., & Berry, O. (2021). Passive eDNA collection enhances aquatic biodiversity analysis. *Communications Biology*, 4(1), 236. doi:10.1038/s42003-021-01760-8

422

423

Blaxter, M. (2003). Molecular systematics: Counting angels with DNA. *Nature*, 421(6919), 122–124.

424

425

Bohmann, K., Evans, A., Gilbert, M. T. P., Carvalho, G. R., Creer, S., Knapp, M., ... de Bruyn, M. (2014). Environmental DNA for wildlife biology and biodiversity monitoring. *Trends in Ecology & Evolution*, 29(6), 358–367. doi:10.1016/j.tree.2014.04.003

426

427

Brooks, M. E., Kristensen, K., van Benthem, K. J., Magnusson, A., Berg, C. W., Nielsen, A., ... Bolker, B. M. (2017). glmmTMB balances speed and flexibility among packages for zero-inflated generalized linear mixed modeling. *R Journal*, 9(2), 378–400. doi:10.32614/rj-2017-066

428

429

Callahan, B. J., McMurdie, P. J., Rosen, M. J., Han, A. W., Johnson, A. J. A., & Holmes, S. P. (2016). DADA2: High-resolution sample inference from Illumina amplicon data. *Nature Methods*, 13(7), 581–583. doi:10.1038/nmeth.3869

430

431

Clare, E. L., Economou, C. K., Faulkes, C. G., Gilbert, J. D., Bennett, F., Drinkwater, R., & Littlefair, J. E. (2021). eDNAir: proof of concept that animal DNA can be collected from air sampling. *PeerJ*, 9, e11030. doi:https://doi.org/10.7717/peerj.11030

432

433

Cruaud, P., Vigneron, A., Fradette, M.-S., Charette, S. J., Rodriguez, M. J., Dorea, C. C., & Culley, A. I. (2017). Open the SterivexTM casing: An easy and effective way to improve DNA extraction yields. *Limnology and Oceanography: Methods*, 15(12), 1015–1020. doi:https://doi.org/10.1002/lom3.10221

434

435

Díaz, S., Settele, J., Brondízio, E. S., Ngo, H. T., Agard, J., Arneeth, A., ... Zayas, C. N. (2019). Pervasive human-driven decline of life on Earth points to the need for transformative change. *Science*, 366(6471), eaax3100. doi:10.1126/science.aax3100

436

437

Drinkwater, R., Schnell, I. B., Bohmann, K., Bernard, H., Veron, G., Clare, E., ... Rossiter, S. J. (2019). Using metabarcoding to compare the suitability of two blood-feeding leech species for sampling mammalian diversity in North Borneo. *Molecular Ecology Resources*, 19(1). doi:10.1111/1755-0998.12943

438

439

Eriksson, B. K., & Hillebrand, H. (2019). Rapid reorganization of global biodiversity. *Science*, 366(6463), 308–309. doi:10.1126/science.aaz4520

440

441

Folloni, S., Kaggle, D.-M., Rajcevic, B., Guimaraes, N., Van Droogenbroeck, B., Valicente, F. H., ... Van den Bulcke, M. (2012). Detection of airborne genetically modified maize pollen by real-time PCR. *Molecular Ecology Resources*, 12(5), 810–821. doi:https://doi.org/10.1111/j.1755-0998.2012.03168.x

442

443

Hartig, F. (2021). DHARMa: Residual Diagnostics for Hierarchical (Multi-Level / Mixed) Regression Models. Retrieved from <http://florianhartig.github.io/DHARMa/>

444

- 463 Hebert, P. D. N., Cywinska, A., Ball, S. L., & DeWaard, J. R. (2003). Biological identifications  
464 through DNA barcodes. *Proceedings of the Royal Society B: Biological Sciences*,  
465 *270*(1512), 313–321. doi:10.1098/rspb.2002.2218
- 466 Hemami, M.-R., Watkinson, A. R., & Dolman, P. M. (2005). Population densities and habitat  
467 associations of introduced muntjac *Muntiacus reevesi* and native roe deer *Capreolus*  
468 *capreolus* in a lowland pine forest. *Forest Ecology and Management*, *215*(1), 224–238.  
469 doi:<https://doi.org/10.1016/j.foreco.2005.05.013>
- 470 Ivanova, N. V., Clare, E. L., & Borisenko, A. V. (2012). *DNA barcoding in mammals. Methods in*  
471 *Molecular Biology* (Vol. 858). doi:10.1007/978-1-61779-591-6\_8
- 472 Johnson, C. N., Balmford, A., Brook, B. W., Buettel, J. C., Galetti, M., Guangchun, L., &  
473 Wilmshurst, J. M. (2017). Biodiversity losses and conservation responses in the  
474 Anthropocene. *Science*, *356*(6335), 270–275. doi:10.1126/science.aam9317
- 475 Johnson, M. D., Cox, R. D., & Barnes, M. A. (2019). Analyzing airborne environmental DNA: A  
476 comparison of extraction methods, primer type, and trap type on the ability to detect  
477 airborne eDNA from terrestrial plant communities. *Environmental DNA*, *1*(2), 176–185.  
478 doi:<https://doi.org/10.1002/edn3.19>
- 479 Kahlke, T., & Ralph, P. J. (2019). BASTA – Taxonomic classification of sequences and sequence  
480 bins using last common ancestor estimations. *Methods in Ecology and Evolution*, *10*(1),  
481 100–103. doi:10.1111/2041-210X.13095
- 482 Mena, J. L., Yagui, H., Tejada, V., Bonifaz, E., Bellemain, E., Valentini, A., ... Lyet, A. (2021).  
483 Environmental DNA metabarcoding as a useful tool for evaluating terrestrial mammal  
484 diversity in tropical forests. *Ecological Applications*, e02335.  
485 doi:<https://doi.org/10.1002/eap.2335>
- 486 Pompanon, F., Deagle, B. E., Symondson, W. O. C., Brown, D. S., Jarman, S. N., & Taberlet, P.  
487 (2012). Who is eating what: Diet assessment using next generation sequencing. *Molecular*  
488 *Ecology*, *21*(8), 1931–1950. doi:10.1111/j.1365-294X.2011.05403.x
- 489 R Development Core Team: R: A language and environment for statistical computing. (2021).
- 490 Ratnasingham, S., & Hebert, P. D. N. (2013). A DNA-based registry for all animal species: the  
491 barcode index number (BIN) system. *PLoS One*, *8*(7), e66213.  
492 doi:10.1371/journal.pone.0066213
- 493 Rees, H. C., Baker, C. A., Gardner, D. S., Maddison, B. C., & Gough, K. C. (2017). The detection  
494 of great crested newts year round via environmental DNA analysis. *BMC Research Notes*,  
495 *10*(1), 327. doi:10.1186/s13104-017-2657-y
- 496 RStudio Team. (2020). RStudio: Integrated Development for R. Boston< MA: RSTUDIO.
- 497 Ruppert, K. M., Kline, R. J., & Rahman, M. S. (2019). Past, present, and future perspectives of  
498 environmental DNA (eDNA) metabarcoding: A systematic review in methods, monitoring,  
499 and applications of global eDNA. *Global Ecology and Conservation*, *17*, e00547.  
500 doi:<https://doi.org/10.1016/j.gecco.2019.e00547>
- 501 Sales, N. G., McKenzie, M. B., Drake, J., Harper, L. R., Browett, S. S., Coscia, I., ... McDevitt, A.  
502 D. (2020). Fishing for mammals: Landscape-level monitoring of terrestrial and semi-aquatic  
503 communities using eDNA from riverine systems. *Journal of Applied Ecology*, *57*(4), 707–  
504 716. doi:<https://doi.org/10.1111/1365-2664.13592>
- 505 Schnell, I. B., Bohmann, K., Schultze, S. E., Richter, S. R., Murray, D. C., Sinding, M.-H. S., ...  
506 Gilbert, M. T. P. (2018). Debugging diversity – a pan-continental exploration of the potential  
507 of terrestrial blood-feeding leeches as a vertebrate monitoring tool. *Molecular Ecology*  
508 *Resources*, *18*(6), 1282–1298. doi:<https://doi.org/10.1111/1755-0998.12912>
- 509 Schubert, M., Lindgreen, S., & Orlando, L. (2016). AdapterRemoval v2: rapid adapter trimming,  
510 identification, and read merging. *BMC Research Notes*, *9*(1), 88. doi:10.1186/s13104-016-  
511 1900-2
- 512 Seibold, S., Gossner, M. M., Simons, N. K., Blüthgen, N., Müller, J., Ambarlı, D., ... Weisser, W.  
513 W. (2019). Arthropod decline in grasslands and forests is associated with landscape-level  
514 drivers. *Nature*, *574*(7780), 671–674. doi:10.1038/s41586-019-1684-3
- 515 Singer, G. A. C., Fahner, N. A., Barnes, J. G., McCarthy, A., & Hajibabaei, M. (2019).  
516 Comprehensive biodiversity analysis via ultra-deep patterned flow cell technology: a case

- 517 study of eDNA metabarcoding seawater. *Scientific Reports*, 9(1), 5991. doi:10.1038/s41598-  
518 019-42455-9
- 519 Tautz, D., Arctander, P., Minelli, A., Thomas, R. H., Vogler, A. P., & Anonymous. (2002). DNA  
520 points the way ahead in taxonomy. *Nature*, 418(6897), 479.
- 521 Taylor, P. G. (1996). Reproducibility of ancient DNA sequences from extinct Pleistocene fauna.  
522 *Molecular Biology and Evolution*, 13(1), 283–285.  
523 doi:10.1093/oxfordjournals.molbev.a025566
- 524 Tilman, D., Clark, M., Williams, D. R., Kimmel, K., Polasky, S., & Packer, C. (2017). Future  
525 threats to biodiversity and pathways to their prevention. *Nature*, 546(7656), 73–81.  
526 doi:10.1038/nature22900
- 527 Ushio, M., Fukuda, H., Inoue, T., Makoto, K., Kishida, O., Sato, K., ... Miya, M. (2017).  
528 Environmental DNA enables detection of terrestrial mammals from forest pond water.  
529 *Molecular Ecology Resources*, 17(6), e63–e75. doi:10.1111/1755-0998.12690
- 530 Valentin, R. E., Fonseca, D. M., Gable, S., Kyle, K. E., Hamilton, G. C., Nielsen, A. L., &  
531 Lockwood, J. L. (2020). Moving eDNA surveys onto land: Strategies for active eDNA  
532 aggregation to detect invasive forest insects. *Molecular Ecology Resources*, 20(3), 746–  
533 755. doi:<https://doi.org/10.1111/1755-0998.13151>
- 534 Willerslev, E., Cappellini, E., Boomsma, W., Nielsen, R., Hebsgaard, M. B., Brand, T. B., ...  
535 Collins, M. J. (2007). Ancient Biomolecules from Deep Ice Cores Reveal a Forested  
536 Southern Greenland. *Science*, 317(5834), 111–114. doi:10.1126/science.1141758
- 537 Willerslev, E., Davison, J., Moora, M., Zobel, M., Coissac, E., Edwards, M. E., ... Taberlet, P.  
538 (2014). Fifty thousand years of Arctic vegetation and megafaunal diet. *Nature*, 506(7486),  
539 47–51. doi:10.1038/nature12921
- 540 Willerslev, E., Hansen, A. J., Binladen, J., Brand, T. B., Gilbert, M. T. P., Shapiro, B., ... Cooper,  
541 A. (2003). Diverse Plant and Animal Genetic Records from Holocene and Pleistocene  
542 Sediments. *Science*, 300(5620), 791–795. doi:10.1126/science.1084114  
543

544 **Figures and Tables**  
545

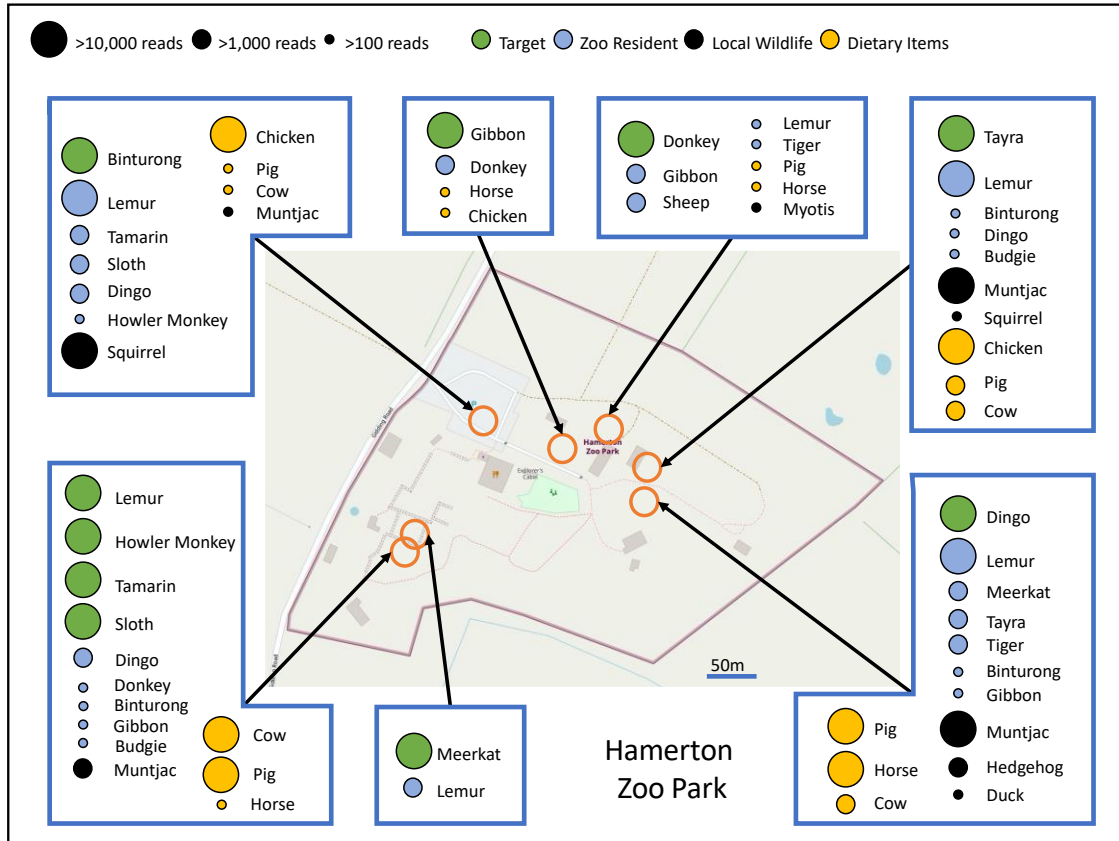

546 **Figure 1: Species identified at seven zoo locations using only DNA collected from air**  
 547 **sampling.** Identifications are colour coded to indicate the origin of the DNA and circles are scaled  
 548 to represent approximate read abundance (low, medium and high copy number). Orange rings  
 549 indicate sampling location. Identifications with <100 copies were excluded from the figure. Full data  
 550 with read counts for all locations are provided in Extended Table 1, 2 and 3  
 551

552

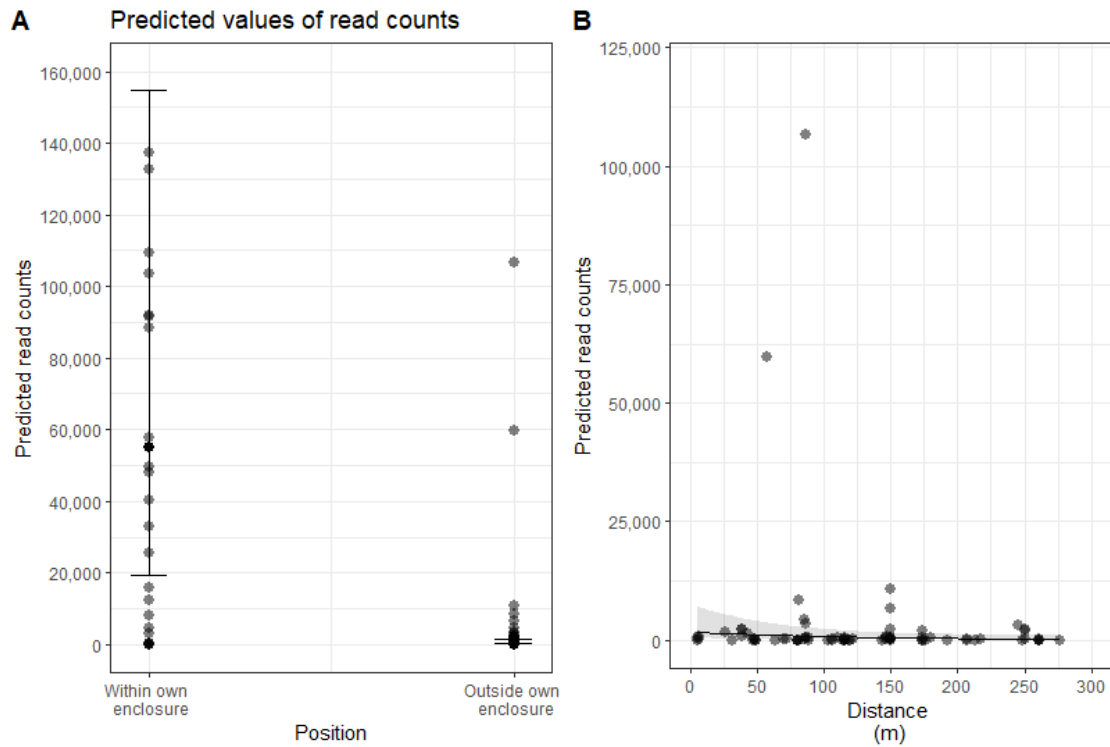

553

554 **Figure 2: Read count variability with distance from known source.** A) Read counts significantly  
555 varied according to the sampling position relative to the animal's own enclosure. Read counts from  
556 samples within the animal's own enclosure were higher than from samples outside the animal's  
557 own enclosure (this also included the enclosures of other animals). B) Read counts were not  
558 significantly affected by distance from the animal, once samples from the animal's own enclosure  
559 were excluded. Both plots show predicted read counts from zero-inflated negative binomial models.

560 **Table 1: DNA based identification of target zoo species at each location.** Cell values represent total read counts from pooled COI, 16s and  
 561 nested 16s amplifications. Each location was sampled 4 times (inside and outside using 0.25 and 0.45µm filters) with the exception of the Primate  
 562 House where three inside and one outside space were sampled (eight samples), the Sloth and Possum House which only had an inside space (two  
 563 samples) and the Meerkat Colony, Cat Circle, Bear Enclosure, Owl Walkway and Bins which were only outside (two samples). N-values represent  
 564 total number of pooled sequencing runs (samples x 3 PCR).

| Location                    | N  | <i>Varecia variegata</i><br>(Black and White Lemur) | <i>Arctictis binturong</i><br>(Javan Binturong) | <i>Canis</i><br>(Dingo) | <i>Hylobates lar</i><br>(Gibbon) | <i>Choloepus didactylus</i><br>(Sloth) | <i>Alouatta caraya</i><br>(Howler Monkey) | <i>Eira barbara</i><br>(Tayra) | <i>Saguinus oedipus</i><br>(Cotton topped Tamarin) | <i>Equus asinus</i><br>(Donkey) | <i>Suricata suricatta</i><br>(Meerkat) | 565   |
|-----------------------------|----|-----------------------------------------------------|-------------------------------------------------|-------------------------|----------------------------------|----------------------------------------|-------------------------------------------|--------------------------------|----------------------------------------------------|---------------------------------|----------------------------------------|-------|
| Ring-Tailed Lemur Enclosure | 12 | 55,183                                              | 279                                             | 0                       | 0                                | 0                                      | 11,064                                    | 2                              | 72                                                 | 554                             | 0                                      | 0     |
| Binturong Enclosure         | 12 | 100,174                                             | 183,201                                         | 2,612                   | 0                                | 2,595                                  | 533                                       | 0                              | 6,557                                              | 1                               | 0                                      | 0     |
| Primate House               | 24 | 892,893                                             | 403                                             | 8,322                   | 243                              | 19,010                                 | 45,136                                    | 20                             | 49,627                                             | 353                             | 0                                      | 0     |
| Tiger Enclosure             | 12 | 29,163                                              | 337                                             | 147,394                 | 1                                | 0                                      | 0                                         | 4,528                          | 0                                                  | 521                             | 0                                      | 568   |
| Dingo Enclosure             | 12 | 99,050                                              | 580                                             | 137,858                 | 424                              | 0                                      | 0                                         | 680                            | 0                                                  | 0                               | 3,025                                  | 1,319 |
| Tayra Enclosure             | 12 | 230,386                                             | 276                                             | 309                     | 1                                | 0                                      | 0                                         | 118,135                        | 0                                                  | 0                               | 0                                      | 25    |
| Meerkat Colony              | 6  | 1,091                                               | 0                                               | 5                       | 0                                | 0                                      | 0                                         | 0                              | 0                                                  | 2                               | 103,438                                | 0     |
| Sloths and Possum House     | 6  | 8                                                   | 0                                               | 0                       | 25                               | 0                                      | 0                                         | 0                              | 0                                                  | 0                               | 0                                      | 569   |
| Lynx Enclosure              | 12 | 85                                                  | 0                                               | 5,442                   | 133                              | 0                                      | 0                                         | 0                              | 0                                                  | 10                              | 0                                      | 220   |
| Maned Wolf Enclosure        | 12 | 208                                                 | 0                                               | 59,739                  | 1,186                            | 0                                      | 0                                         | 0                              | 0                                                  | 514                             | 0                                      | 0     |
| Cheetah Enclosure           | 12 | 77                                                  | 0                                               | 0                       | 370                              | 0                                      | 0                                         | 0                              | 0                                                  | 6                               | 0                                      | 0     |
| Gibbon Enclosure            | 12 | 28                                                  | 0                                               | 0                       | 113,889                          | 0                                      | 0                                         | 0                              | 0                                                  | 8,309                           | 261                                    | 570   |
| Camel Enclosure             | 12 | 1,009                                               | 0                                               | 3                       | 0                                | 0                                      | 0                                         | 0                              | 0                                                  | 1                               | 0                                      | 0     |
| Wallaby Enclosure           | 12 | 0                                                   | 0                                               | 87                      | 0                                | 0                                      | 0                                         | 0                              | 0                                                  | 1                               | 0                                      | 0     |
| Possum Enclosure            | 12 | 2,860                                               | 0                                               | 22                      | 0                                | 0                                      | 0                                         | 0                              | 0                                                  | 0                               | 1,669                                  | 0     |
| Donkey Enclosure            | 12 | 354                                                 | 0                                               | 0                       | 319                              | 0                                      | 0                                         | 0                              | 0                                                  | 242,392                         | 0                                      | 671   |
| Cat Circle                  | 6  | 429                                                 | 0                                               | 341                     | 0                                | 0                                      | 0                                         | 0                              | 0                                                  | 0                               | 0                                      | 0     |
| Bear Enclosure              | 6  | 12                                                  | 0                                               | 0                       | 8                                | 0                                      | 0                                         | 0                              | 0                                                  | 0                               | 0                                      | 0     |
| Owl Walkway                 | 6  | 10                                                  | 0                                               | 0                       | 0                                | 0                                      | 0                                         | 0                              | 0                                                  | 0                               | 0                                      | 0     |
| Bins                        | 6  | 8                                                   | 0                                               | 0                       | 0                                | 0                                      | 0                                         | 0                              | 0                                                  | 0                               | 0                                      | 0     |

572

573

574 **Table 2: DNA based identification of non-target zoo species at each location.** Cell values  
 575 represent total read counts from COI, 16s and nested 16s amplifications. Each location was  
 576 sampled 4 times (inside and outside using 0.25 and 0.45µm filters) with the exception of the Primate  
 577 House where three inside and one outside space were sampled (eight samples), the Sloth and  
 578 Possum House which only had an inside space (two samples) and the Meerkat Colony, Cat Circle,  
 579 Bear Enclosure, Owl Walkway and Bins which were only outside (two samples). N-values represent  
 580 total number of pooled sequencing runs (samples x 3 PCR).

| Location                    | N  | Non-Target Zoo Animals                     |                                                |                              |                        |                                             |
|-----------------------------|----|--------------------------------------------|------------------------------------------------|------------------------------|------------------------|---------------------------------------------|
|                             |    | <i>Grus carunculata</i><br>(Wattled Crane) | <i>Melospittacus undulatus</i><br>(budgerigar) | <i>Ovis aries</i><br>(Sheep) | <i>Capra</i><br>(Goat) | <i>Taeniopygia guttata</i><br>(Zebra Finch) |
| Ring-Tailed Lemur Enclosure | 12 | 0                                          | 0                                              | 0                            | 0                      | 0                                           |
| Binturong Enclosure         | 12 | 0                                          | 0                                              | 0                            | 0                      | 0                                           |
| Primate House               | 24 | 3                                          | 443                                            | 27                           | 0                      | 0                                           |
| Tiger Enclosure             | 12 | 0                                          | 0                                              | 0                            | 0                      | 0                                           |
| Dingo Enclosure             | 12 | 7                                          | 0                                              | 0                            | 0                      | 0                                           |
| Tayra Enclosure             | 12 | 1                                          | 442                                            | 0                            | 0                      | 0                                           |
| Meerkat Colony              | 6  | 165                                        | 0                                              | 0                            | 0                      | 0                                           |
| Sloths / Possum House       | 6  | 0                                          | 0                                              | 30                           | 0                      | 0                                           |
| Lynx Enclosure              | 12 | 245                                        | 0                                              | 0                            | 0                      | 90                                          |
| Maned Wolf Enclosure        | 12 | 0                                          | 0                                              | 0                            | 0                      | 0                                           |
| Cheetah Enclosure           | 12 | 12,955                                     | 0                                              | 0                            | 0                      | 0                                           |
| Gibbon Enclosure            | 12 | 0                                          | 0                                              | 0                            | 0                      | 0                                           |
| Camel Enclosure             | 12 | 0                                          | 0                                              | 231                          | 0                      | 0                                           |
| Wallaby Enclosure           | 12 | 0                                          | 0                                              | 2,791                        | 0                      | 0                                           |
| Possum Enclosure            | 12 | 0                                          | 0                                              | 14                           | 0                      | 63                                          |
| Donkey Enclosure            | 12 | 1                                          | 0                                              | 1,654                        | 0                      | 0                                           |
| Cat Circle                  | 6  | 0                                          | 0                                              | 0                            | 0                      | 0                                           |
| Bear Enclosure              | 6  | 0                                          | 0                                              | 231                          | 8                      | 0                                           |
| Owl Walkway                 | 6  | 0                                          | 0                                              | 0                            | 0                      | 0                                           |
| Bins                        | 6  | 0                                          | 0                                              | 0                            | 0                      | 0                                           |

581

582 **Table 3: DNA based identification of non-zoo species at each location.** Cell values represent  
 583 total read counts from COI, 16s and nested 16s amplifications. Each location was sampled 4 times  
 584 (inside and outside using 0.25 and 0.45µm filters) with the exception of the Primate House where  
 585 three inside and one outside space were sampled (eight samples), the Sloth and Possum House  
 586 which only had an inside space (two samples) and the Meerkat Colony, Cat Circle, Bear Enclosure,  
 587 Owl Walkway and Bins which were only outside (two samples). N-values represent total number of  
 588 pooled sequencing runs (samples x 3 PCR).

| Location                    | N  | Food or Farm               |                                  |                            |                                   | Native                                   |                     |                            |                                  | Invasive<br>Or Food |
|-----------------------------|----|----------------------------|----------------------------------|----------------------------|-----------------------------------|------------------------------------------|---------------------|----------------------------|----------------------------------|---------------------|
|                             |    | <i>Bos taurus</i><br>(Cow) | <i>Equus caballus</i><br>(Horse) | <i>Sus scrofa</i><br>(Pig) | <i>Gallus gallus</i><br>(Chicken) | <i>Erinaceus europaeus</i><br>(Hedgehog) | Anatidae*<br>(Duck) | <i>Myotis sp.</i><br>(Bat) | <i>Sciurus sp.</i><br>(Squirrel) |                     |
| Ring-Tailed Lemur Enclosure | 12 | 26                         | 0                                | 5,714                      | 1                                 | 0                                        | 0                   | 0                          | 0                                | 0                   |
| Binturong Enclosure         | 12 | 487                        | 20                               | 322                        | 27,426                            | 39                                       | 0                   | 0                          | 108,799                          | 588                 |
| Primate House               | 24 | 81,030                     | 166                              | 171,441                    | 75                                | 0                                        | 14                  | 0                          | 0                                | 1,946               |
| Tiger Enclosure             | 12 | 38                         | 240                              | 394                        | 342                               | 77                                       | 0                   | 0                          | 0                                | 3,120               |
| Dingo Enclosure             | 12 | 8,133                      | 15,780                           | 56,915                     | 85                                | 3,262                                    | 318                 | 0                          | 0                                | 51,889              |
| Tayra Enclosure             | 12 | 1,864                      | 0                                | 1,252                      | 87,012                            | 0                                        | 0                   | 0                          | 718                              | 28,579              |
| Meerkat Colony              | 6  | 0                          | 0                                | 0                          | 7                                 | 0                                        | 0                   | 0                          | 0                                | 0                   |
| Sloths / Possum House       | 6  | 9,667                      | 0                                | 3,156                      | 0                                 | 0                                        | 0                   | 0                          | 0                                | 0                   |
| Lynx Enclosure              | 12 | 15                         | 0                                | 12                         | 27,690                            | 0                                        | 0                   | 0                          | 0                                | 0                   |
| Maned Wolf Enclosure        | 12 | 282                        | 0                                | 0                          | 0                                 | 0                                        | 0                   | 0                          | 0                                | 0                   |
| Cheetah Enclosure           | 12 | 1,351                      | 0                                | 0                          | 0                                 | 0                                        | 0                   | 0                          | 0                                | 0                   |
| Gibbon Enclosure            | 12 | 15                         | 0                                | 0                          | 160                               | 0                                        | 0                   | 0                          | 0                                | 0                   |
| Camel Enclosure             | 12 | 2,141                      | 0                                | 0                          | 0                                 | 0                                        | 0                   | 0                          | 0                                | 0                   |
| Wallaby Enclosure           | 12 | 623                        | 0                                | 0                          | 0                                 | 0                                        | 0                   | 0                          | 0                                | 0                   |
| Possum Enclosure            | 12 | 3,551                      | 0                                | 0                          | 0                                 | 0                                        | 0                   | 0                          | 0                                | 0                   |
| Donkey Enclosure            | 12 | 43                         | 133                              | 272                        | 0                                 | 0                                        | 0                   | 553                        | 0                                | 0                   |
| Cat Circle                  | 6  | 2,405                      | 0                                | 0                          | 2                                 | 0                                        | 0                   | 0                          | 0                                | 0                   |
| Bear Enclosure              | 6  | 31,905                     | 0                                | 0                          | 8                                 | 0                                        | 35                  | 0                          | 0                                | 0                   |
| Owl Walkway                 | 6  | 0                          | 0                                | 0                          | 0                                 | 0                                        | 0                   | 0                          | 0                                | 0                   |
| Bins                        | 6  | 90                         | 0                                | 0                          | 1                                 | 0                                        | 0                   | 0                          | 0                                | 0                   |

589 \* could represent an identification to either zoo stock or wildfowl

590

591

592 **Supplementary Information is available for this paper**

593 Supplementary File 1 contains a detailed table associated with read counts for each PCR

594 reaction.
